# Supplementary material for: An Avian Retrovirus Uses Canonical Expression and Processing Mechanisms To Generate Viral MicroRNA
Source: PubMed Central journal article supplement (PMC3911700; doi:10.1128/jvi.02921-13), 2014-01
Supplement: JVI.02921-13_zjv999098470so1.pdf [file JVI.02921-13_zjv999098470so1.pdf]

Fig. S1 E (XSR) miRNA sequences are conserved

|            | E (XSR) miRNA-5p                         | loop region   | E (XSR) miRNA-3p                               |    |
|------------|------------------------------------------|---------------|------------------------------------------------|----|
| Z46390.1   | -----TGCCTTAGACTATTCAAGTTGCCTCTGTGG      | -----ATTA     | --GGACTGGAGGCAGCTCGGATGGTCTGATGGCCA--          | 68 |
| HM452342.1 | -----GTTTTGCCTTGGACTATTCAAGTTGCCTCTGTGA  | -----ATTG     | --GGGCTGGAGGCAGCTCGGATGGTCTGCTGGCCA--          | 78 |
| AY689449.1 | -----GTTTTGTCTTAGACTATTCAAGTTGCCTCTGTGG  | -----A        | -----CTGGAGGCAGCTCGGATGGTCTGATGGCCA--          | 66 |
| L29199.1   | -----GTTTTGCCTTAGACTATTCAAGTTGCCTCTGTGG  | -----ATTA     | --GGGCTGGAGGCAGCTCGGATGGTCTGACGGCCAGA          | 74 |
| V01169.1   | -----GTTTTGCCTTAGACTATTCAAGTTGCCTCTGTGG  | -----ATTA     | --GGGCTGGAGGCAGCTCGGATGGTCTGACGGCCAGA          | 74 |
| D10652.1   | -----GTTTTGCCTTAGACTATTCAAGTTGCCTCTGTGG  | -----ATTA     | --GGGCTGGAGGCAGCTCGGATGGTCTGACGGCCAGA          | 74 |
| U41727.1   | -----GTTTTGCCTTAGACTATTCAAGTTGCCTCTGTGG  | -----ATTA     | --GGGCTGGAGGCAGCTCGGATGGTCTGACGGCCAGA          | 74 |
| AF052428.1 | -----GTTTTGCCTTAGACTATTCAAGTTGCCTCTGTGG  | -----ATTA     | --GGGCTGGAGGCAGCTCGGATGGTCTGACGGCCAGA          | 80 |
| K00928.1   | -----GTTTTGCCTTAGACTATTCAAGTTGCCTCTGTGG  | -----ATTA     | --GGGCTGGAGGCAGCTCGGATGGTCTGACGGCCAGA          | 74 |
| DQ365814.1 | -----GTTTTGCCTTAGACTATTCAAGTTGCCTCTGTGG  | -----ATTA     | --GGGCTGGAGGCAGCTCGGATGGTCTGATGGCCAGA          | 74 |
| HM776937.1 | -----GTTTTGCCTTAGACTATTCAAGTTGCCTCTGTGG  | -----ATTA     | --GGGCTGGAGGCAGCTCGGATGGTCTGATGGCCAGA          | 74 |
| M30022.1   | -----GTTTTGCCTTAGACTATTCAAGTTGCCTCTGTAG  | -----ATTA     | --GGGCTGGAGGCAGCTCGGATGGTCTGATGGCCAGA          | 74 |
| X12707.1   | -----GTTTTGCCTTAGACTATTCAAGTTGCCTCTGTGG  | -----ATTA     | --GGGCTGGAGGCAGCTCGGATGGTCTGATGG----           | 69 |
| X06198.1   | -----GTTTTGCCTTAGACTATTCAAGTTGCCTCTGTGG  | -----ATTA     | --GGGCTGGAGGCAGCTCGGATGGTCTGATGG----           | 69 |
| X15345.1   | -----GTTTTGCCTTAGACTATTCAAGTTGCCTCTGTGG  | -----ATTA     | --GGGCTGGAGGCAGCACCAGGATAGTCTGATGGCCA--        | 78 |
| X52822.1   | -----GTTTTGCCTTAGACTATTCAAGTTGCCTCTGTGG  | -----ATTA     | --GGGCTGGAGGCAGCACCAGGATAGTCTGATGGCCA--        | 72 |
| M14897.1   | -----GTTTTGCCTTAGACTATTCAAGTTGCCTCTGTGG  | -----ATTA     | --GGGCTGGAGGCAGCACCAGGATAGTCTGATGGCCA--        | 72 |
| J02342.1   | -----GTTTTGCCTTAGACTATTCAAGTTGCCTCTGTGG  | -----ATTA     | --GGGCTGGAGGCAGCACCAGGATAGTCTGATGGCCA--        | 78 |
| M21955.1   | -----GTTTTGCCTTAGACTATTCAAGTTGCCTCTGTGG  | -----ATTA     | --GGGCTGGAGGCAGCACCAGGATAGTCTGATGGCCA--        | 72 |
| M16582.1   | -----GTTTTGCCTTAGACTATTCAAGTTGCCTCTGTGG  | -----ATTA     | --GGGCTGGAGGCAGCACCAGGATAGTCTGATGGCCA--        | 72 |
| AF033808.1 | -----GTTTTGCCTTAGACTATTCAAGTTGCCTCTGTGG  | -----ATTA     | --GGGCTGGAGGCAGCACCAGGATAGTCTGATGGCCA--        | 78 |
| V01197.1   | -----GTTTTGCCTTAGACTATTCAAGTTGCCTCTGTGG  | -----ATTA     | --GGGCTGGAGGCAGCACCAGGATAGTCTGATGGCCA--        | 72 |
| X13818.1   | -----GTTTTGCCTTAGACTATTCAAGTTGCCTCTGTGG  | -----ATTA     | --GGGCTGGAGGCAGCACCAGGATAGTCTGATGGCCA--        | 72 |
| X51863.1   | -----GTTTTGCCTTAGACTATTCAAGTTGCCTCTGTGG  | -----ATTA     | --GGGCTGGAGGCAGCACCAGGATAGTCTGATGGCCA--        | 72 |
| X68524.1   | -----GTTTTGCCTTAGACTATTCAAGTTGCCTCTGTGG  | -----ATTA     | --GGGCTGGAGGCAGCACCAGGATAGTCTGATGGCCA--        | 72 |
| X51861.1   | -----GTTTTGCCTTAGACTATTCAAGTTGCCTCTGTGG  | -----ATTA     | --GGGCTGGAGGCAGCACCAGGATAGTCTGATGGCCA--        | 72 |
| L21974.1   | -----GTTTTGCCTTAGACTATTCAAGTTGCCTCTGTGG  | -----ATTA     | --GGGCTGGAGGCAGCACCAGGATAGTCTGATGGCCA--        | 72 |
| M21526.1   | -----GTTTTGCCTTAGACTATTCAAGTTGCCTCTGTGG  | -----ATTA     | --GGGCTGGAGGCAGCACCAGGATAGTCTGATGGCCA--        | 72 |
| K03523.1   | -----GTTTTGCCTTAGACTATTCAAGTTGCCTCTGTGG  | -----ATTA     | --GGGCTGGAGGCAGCACCAGGATAGTCTGATGGCCA--        | 72 |
| M16581.1   | -----GTTTTGCCTTAGACTATTCAAGTTGCCTCTGTGG  | -----ATTA     | --GGGCTGGAGGCAGCACCAGGATAGTCTGATGGCCA--        | 72 |
| AB303223.1 | -----GTTTCGCCTTAGACTATTCAAGTTGCCTCTGTGG  | -----ATTA     | --GGGCTGGAGGCAGCTCGGATGGTCTGATGGCCA--          | 72 |
| GU982308.1 | -----GTTTTGCCTTAGACTATTCAAGTTGCCTCTGTGGG | TTATCGAGAATTA | --GGACTGGAGGCAGCTCGGATGGTCTGATGGCCA--          | 83 |
| AY689466.1 | -----GTTTTGCCTTAGACTATTCAAGTTGCCTCTGTGG  | -----         | -----ACAGGAGGCAGCTGGATGGTCTGATGGCCA--          | 66 |
| GU982309.1 | -----GTTTTGCCTTAGACTATTCAAGTTGCCTCTGTGG  | -----ATTA     | --GGACTGGAGGCAGCTCGGATGGTCTGATGGCCA--          | 72 |
| GU982310.1 | -----GTTTTGCCTTAGACTATTCAAGTTGCCTCTGTGG  | -----ATTA     | --GGACTGGAGGCAGCTCGGATGGTCTGATGGCCA--          | 78 |
| GU982307.1 | -----GTTTTGCCTTAGACTATTCAAGTTGCCTCTGTGG  | -----ATTA     | --GGACTGGAGGCAGCTCGGATGGTCTGATGGCCA--          | 81 |
| AF257655.1 | -----GTTTTGCCTTAGACTATTCAAGTTGCCTCTGTGG  | -----ATTA     | --GGACTGGAGGCAGCTCAGATGGTCTGATGGCCA--          | 72 |
| HM600813.1 | -----GTTTTGCCTTAGACTATTCAAGTTGCCTCTGTGG  | -----ATTA     | --GGACTGGAGGCAGCTCGGATGGTCTGATGGCCA--          | 72 |
| HM600812.1 | -----GTTTTGCCTTAGACTATTCAAGTTGCCTCTGTGG  | -----ATTA     | --GGACTGGAGGCAGCTCGGATGGTCTGATGGCCA--          | 72 |
| HM235668.1 | -----GTTTTGCCTTAGACTATTCAAGTTGCCTCTGTGG  | -----ATTA     | --GGACTGGAGGCAGCTCGGATGGTCTGATGGCCA--          | 78 |
| HM582657.1 | -----GTTTTGCCTTAGACTATTCAAGTTGCCTCTGTGG  | -----ATTA     | --GGACTGAGAGCGGCTCGGATGGTCTGATGGCCA--          | 74 |
| AY689454.1 | -----GTTTTGCCTTAGACTATTCAAGTTGCCTCTGTGG  | -----ATTA     | --GGACTGGAGGCAGCTCGGATGGTCTGATGGCCA--          | 72 |
| AY027920.1 | -----GTTTTGCCTTAGACTATTCAAGTTGCCTCTGTGG  | -----ATTA     | --GGACTGGAGGCAGCTCGGATGGTCTGATGGCCA--          | 72 |
| AF305091.1 | -----GTTTTGCCTTAGACTATTCAAGTTGCCTCTGTGG  | -----ATTA     | --GGACTGGAGGCAGCTCGGATGGTCTGATGGCCA--          | 72 |
| AY689444.1 | -----GTTTTGCCTTAGACTATTCAAGTTGCCTCTGTGG  | -----ATTA     | --GGACTGGAGGCAGCTCGGATGGTCTGATGGCCA--          | 72 |
| AY689449.1 | -----TGCCTTAGACTATTCAAGTTGCCTCTGTGG      | -----         | -----ACTGGTGGACTGGAGGCAGCTCGGATGGTCTGATGGCCA-- | 70 |
| AY689441.1 | -----TTGCCTTAGACTATTCAAATGGCTCGGTGG      | -----         | -----ACTGGTGGACTGGAGGCAGCTCGGATGATCTGATGGCCA-- | 71 |
| AY689456.1 | -----GTTTTGCCTTAGACTATTCAAGTTGCCTCTGTGG  | -----         | -----ACTGGTGGACTGAAGGCAGCTGGATGGTCTGATGGCCA--  | 74 |
| AY689455.1 | -----GTTTTGCCTTAGACTATTCAAGTTGCCTCTGTGG  | -----         | -----ACTGGTGGACTGAAGGCAGCTGGATGGTCTGATGGCCA--  | 80 |
| AY689445.1 | -----TTTGCCTTAGACTATTCAAGTTGCCTCTGTGG    | -----         | -----ACTGGTGGACTGAAGGCRCCTCGGATGGTCTGATGGCCA-- | 72 |
| AF307949.1 | -----GTTTTGCCTTAGACTATTCAAGTTGCCTCTGTGG  | -----         | -----ACTGGTGGACTGGAGGCAGCTGGATGGTCTGATGGCCA--  | 74 |
| AY689467.1 | -----TTGCCTTAGACTATTCAAGTTGCCTCTGTGG     | -----         | -----ACTGGTGGACTGGAGGCAGCTCGGATGGTCTGATGGCCA-- | 71 |
| AY689447.1 | -----GTTTT-CCCTTAGACTATTCAAGTTGCCTCTGTGG | -----         | -----ACTGGTGGACTGGAGGCAGCTGGATGGTCTGATGGCCA--  | 73 |
| AY689460.1 | -----GTTTTGCCTTAGACTATTCAAGTTGCCTCTGTGG  | -----         | -----ACTGGTGGACTGGAGGCAGCTCGGATGGTCTGATGGCCA-- | 74 |
| AY689462.1 | -----GTTTTGCCTTAGACTATTCAAGTTGCCTCTGCGG  | -----         | -----ACTGGTGGACTGGAGGCAGCTCGGATGGTCTGATGGCCA-- | 74 |
| AY689452.1 | -----GTTTTGCCTTAGACTATTCAAGTTGCCTCTATGG  | -----         | -----ACTGGTGGACTGGAGGCAGCTCGGATGGTCTGATGGCCA-- | 74 |
| AY689442.1 | -----GTTTTGCCTTAGACTATTCAAGTTGCCTCTA     | -----         | -----GACTGGAGGCAGCTCGGATGGTCTGATGGCCA--        | 64 |
| EU264064.1 | -----GTTTCGCCTTAGACTATTCAAGTTGCCTCTGTGG  | -----         | -----ACTGATGGACTGGAGGCAGCTCGGATGGTCTGATGGCCA-- | 74 |
| FJ216405.1 | -----GTTTCGCCTTAGACTATTCAAGTTGCCTCTGTGG  | -----         | -----ACTGATGGACTGGAGGCAGCTCGGATGGTCTGATGGCCA-- | 74 |
| EU264065.1 | -----GTTTCGCCTTAGACTATTCAAGTTGCCTCTGTGG  | -----         | -----ACTGATGGACTGGAGGCAGCTCGGATGGTCTGATGGCCA-- | 74 |
| AY689468.1 | -----GTTTTGCCTTAGACTATTCAAGTTGCCTCTGTGG  | -----         | -----ACTGGTGGACTGGAGGCAGCTCGGATAGTCTGATGGCCA-- | 74 |
| AY689438.1 | -----GTTTTGCCTTAGACTATTCAAGTTGCCTCTGTGG  | -----         | -----ACTGGTGGACTGGAGGCAGCTCGGATAGTCTGATGGCCA-- | 80 |
| AY689450.1 | -----GTTTTGCCTTAGACTATTCAAGTTGCCTCTGTGG  | -----         | -----ACTGGTGGACTGGAGGCAGCTCGGATAGTCTGATGGYCA-- | 74 |
| AY689465.1 | -----GTTTTGCCTTAGAYATTCAAGTTGCCTCTG      | -----         | -----TGGACTGGAGGCAGCTCGGATGGTCTGATGGCCA--      | 66 |

### **Supplementary Figure S1**

Sequence alignment of all E (XSR) pre-miRNA sequences of ALV-J and RSV strains available in the GenBank showing positions of the mature -5p and -3p miRNAs (shaded light blue). The changes in comparison with HPRS-103 sequences are underlined.
